# Supplementary material for: Light-controlled reversible self-assembly of nanorod suprastructures
Source: Royal Society of Chemistry journal article supplement (doi:10.1039/c7cc03280c), 2017-01-01
Supplement: c7cc03280c1.pdf [file c7cc03280c1.pdf]

## **Electronic Supplementary Information (ESI)**

### **Light-controlled reversible self-assembly of nanorod suprastructures**

Jie Guo,<sup>a</sup> Heng-Yi Zhang,\*<sup>a,b</sup> Yan Zhou<sup>a</sup> and Yu Liu\*<sup>a,b</sup>

<sup>a</sup> Department of Chemistry, State Key Laboratory of Elemento-Organic Chemistry, (Tianjin),  
Nankai University, Tianjin 300071, P. R. China

<sup>b</sup> Collaborative Innovation Center of Chemical Science and Engineering (Tianjin)  
Nankai University, Tianjin 300071 (P. R. China)

E-mail: hyzhang@nankai.edu.cn, yuliu@nankai.edu.cn,

## Contents

|                                                                        |         |
|------------------------------------------------------------------------|---------|
| S1. Materials and instruments                                          | S3-S3   |
| S2. Synthesis and characterization of compounds                        | S3-S5   |
| S3. Protonation of DPD and DPD@polypseudorotaxane by hydrochloric acid | S5-S10  |
| S4. Protonation of DPD@polypseudorotaxane <b>1</b> by light            | S10-S13 |

## **S1 Materials and instruments**

Reagent grade  $\beta$ -cyclodextrin ( $\beta$ -CD) was purchased from Sigma and recrystallized twice from water followed by dehydration in vacuum at 95 °C. 4,4'-dipyridine (DPD) and zinc chloride ( $\text{ZnCl}_2$ ) were commercially available and used without further purification. 2,3,3-trimethylindolenine, propane sultone, and 2-hydroxybenzaldehyde were commercially obtained and used without further purification. All other chemicals used in this study were of analytical grade.

The pH values were collected on a commercially available instrument.  $^1\text{H}$  NMR spectra were recorded in deuterium oxide at  $298 \pm 0.1$  K on a Bruker AV600 spectrometer. Fourier transform infrared spectra (FT-IR) were performed on a Bio-rad FTS6000 with samples prepared as KBr pellets. The UV-vis absorption spectral studies were carried out on a ThermoFisher EVO300 PC spectrophotometer. Transmission electron microscope (TEM) experiments were performed with a Tecnai G2 F20 to analyse the morphology of supramolecular assemblies. Dynamic light scattering (DLS) was conducted with Nanobrook 173plus (Brookhaven Co. USA) using a vertically polarized light at  $\lambda = 488$  nm.

## **S2 Synthesis and characterization of compounds**

### **Synthesis of MEH**

The synthesis of MEH was carried out following a literature procedure.<sup>1</sup> Starting material 2,3,3-trimethyl-1-(3-sulfonatepropyl)-3H-indolium was synthesized by the reaction of 2,3,3-trimethylindolenine with propane sultone. To an anhydrous ethanol were added 2-hydroxybenzaldehyde and 2,3,3-trimethyl-1-(3-sulfonatepropyl)-3Hindolium. The reaction mixture was refluxed overnight, filtered at room temperature give orange solid MEH.

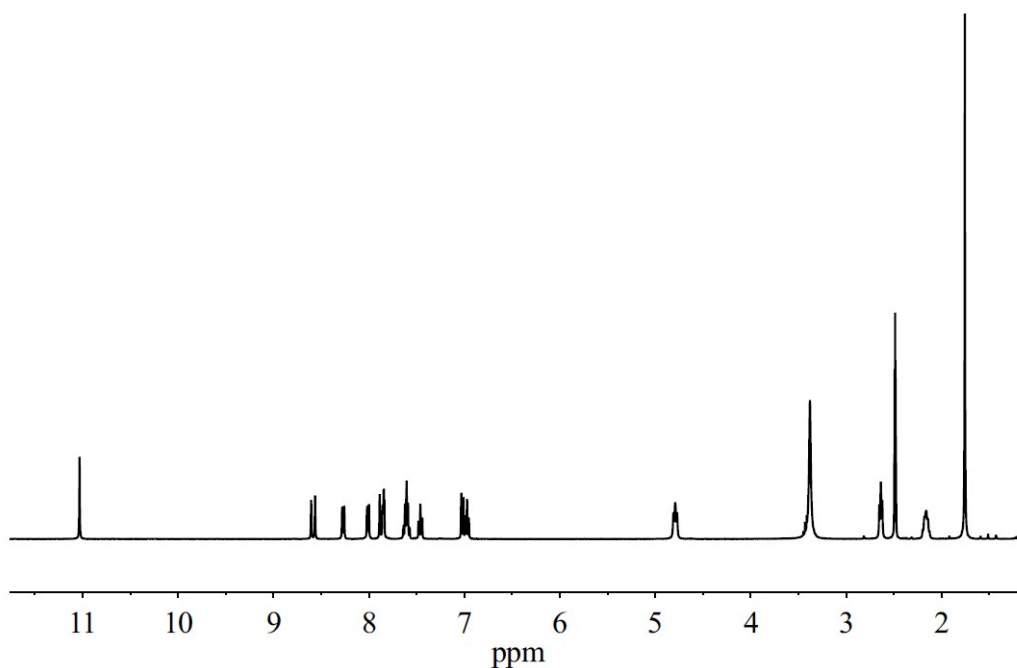

**Figure S1.**  $^1\text{H}$  NMR spectrum of MEH (400 MHz,  $\text{D}_2\text{O}$ , 298 K).

### **Preparation of polypseudorotaxane 1**

Complex  $\beta\text{-CD/DPD}$  was synthesized by the reaction of DPD with  $\beta\text{-CD}$  in aqueous solution. As for the synthesis of polypseudorotaxane **1**, an aqueous solution of  $\text{ZnCl}_2$  was slowly added to an aqueous solution of  $\beta\text{-CD/DPD}$ . The reaction mixture was then stirred at 40 °C for 7 h. The resulting solution was concentrated under a reduced pressure. After filtration the solid was recrystallized from water and dried under vacuum.

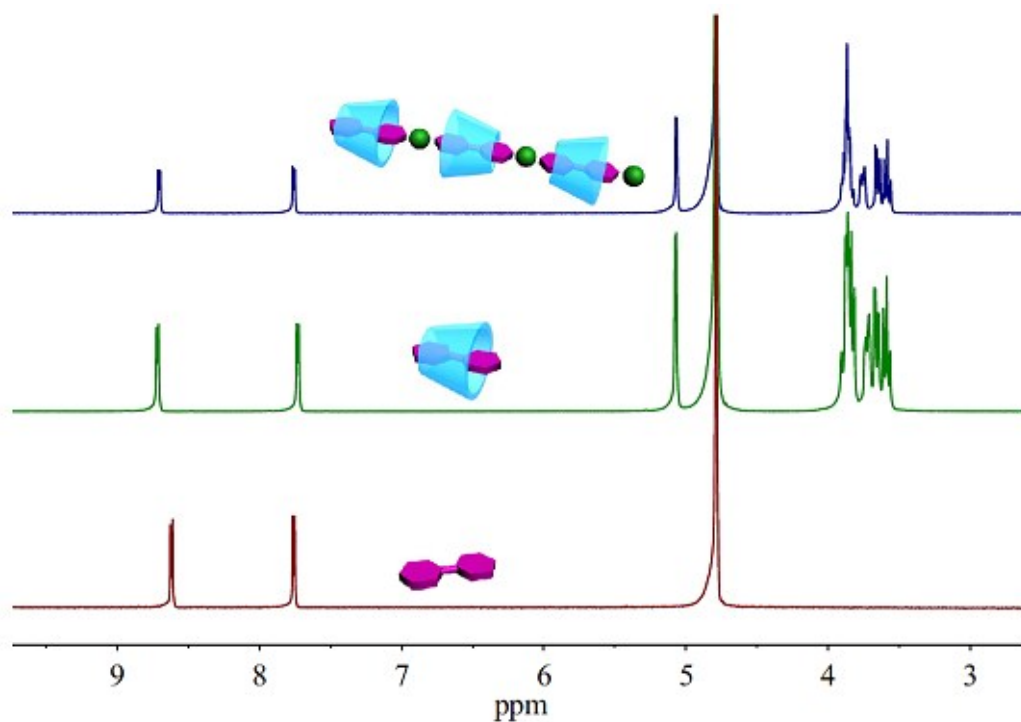

**Figure S2.**  $^1\text{H}$  NMR spectra of polypseudorotaxane **1**, complex  $\text{DPD} \subset \beta\text{-CD}$  and DPD (400 MHz,  $\text{D}_2\text{O}$ , 298 K).

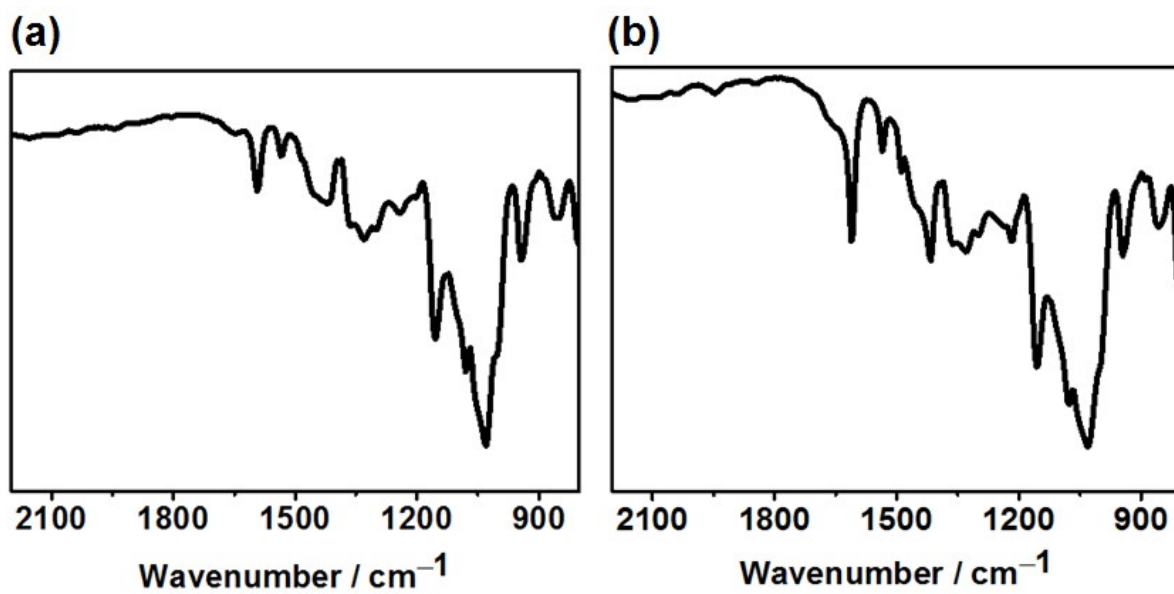

**Figure S3.** FT-IR of (a) complex  $\text{DPD} \subset \beta\text{-CD}$  and (b) polypseudorotaxane **1**.

### S3 Protonation of DPD and DPD@polypseudorotaxane by Hydrochloric Acid (HCl)

Adding of DPD with HCl to adjust the pH to 3 was performed in D<sub>2</sub>O. <sup>1</sup>H NMR changes were monitored during the adding process because of the protonation of DPD. In addition, the protonation of polypseudorotaxane **1** at different pH values was carried out by adding a series of DCl to a D<sub>2</sub>O solution of **1** and detected by <sup>1</sup>H NMR.

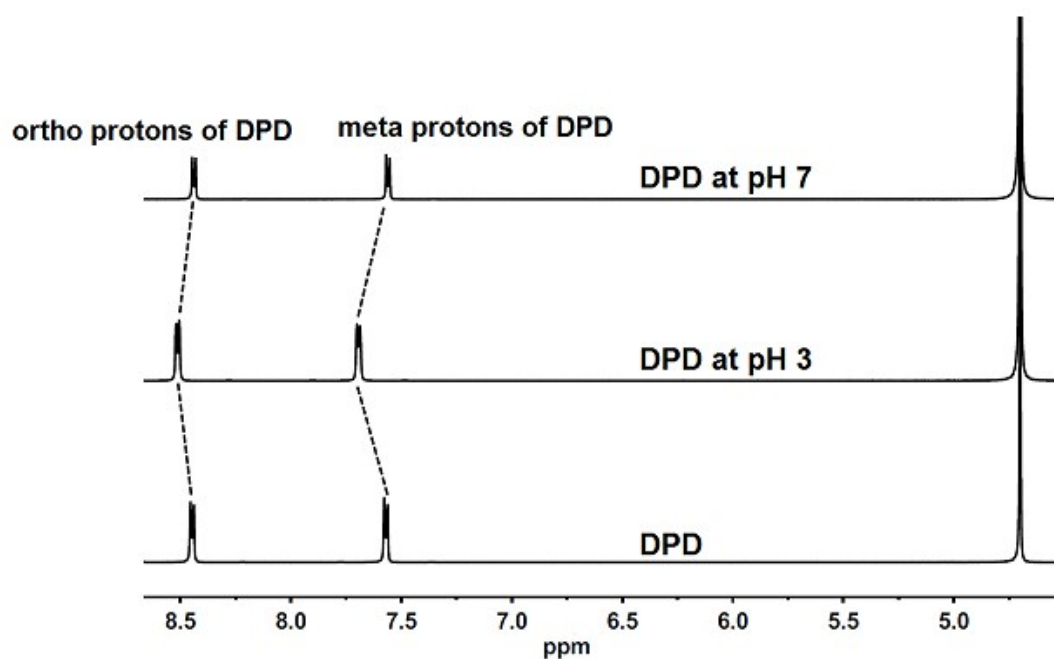

**Figure S4.** <sup>1</sup>H NMR of DPD upon the sequential addition of HCl and NaOH (400 MHz, D<sub>2</sub>O, 298 K).

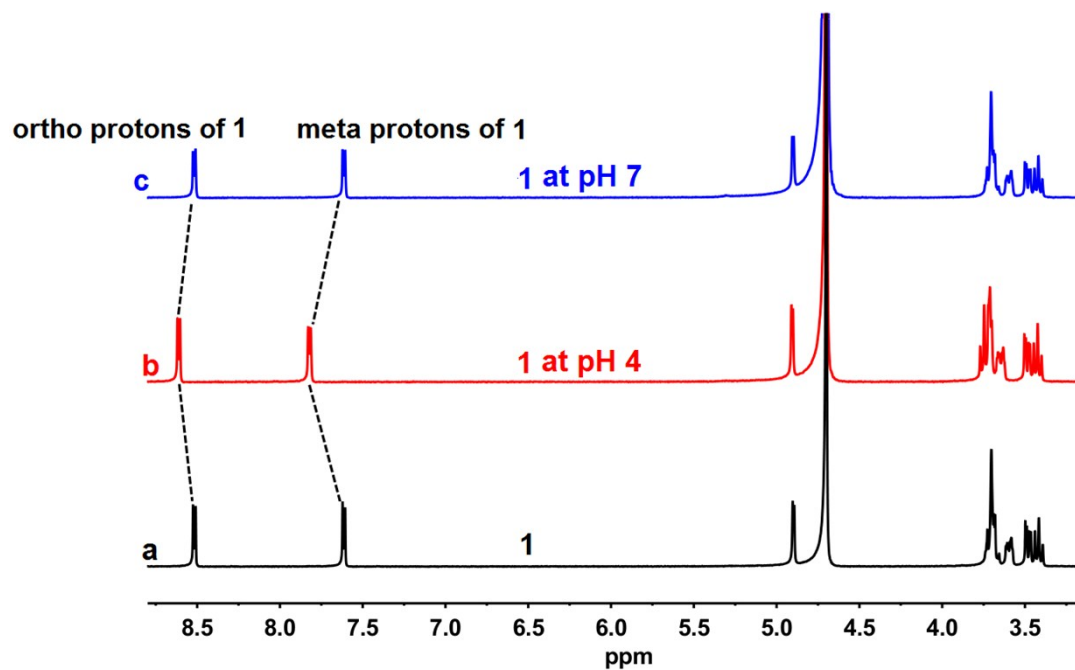

**Figure S5.**  $^1\text{H}$  NMR of (a) **1** ( $2.0 \times 10^{-4}$  M) (b) **1** ( $2.0 \times 10^{-4}$  M) + HCl with pH 4 (c) **1** ( $2.0 \times 10^{-4}$  M) + HCl + NaOH with pH 7 (400 MHz,  $\text{D}_2\text{O}$ , 298 K).

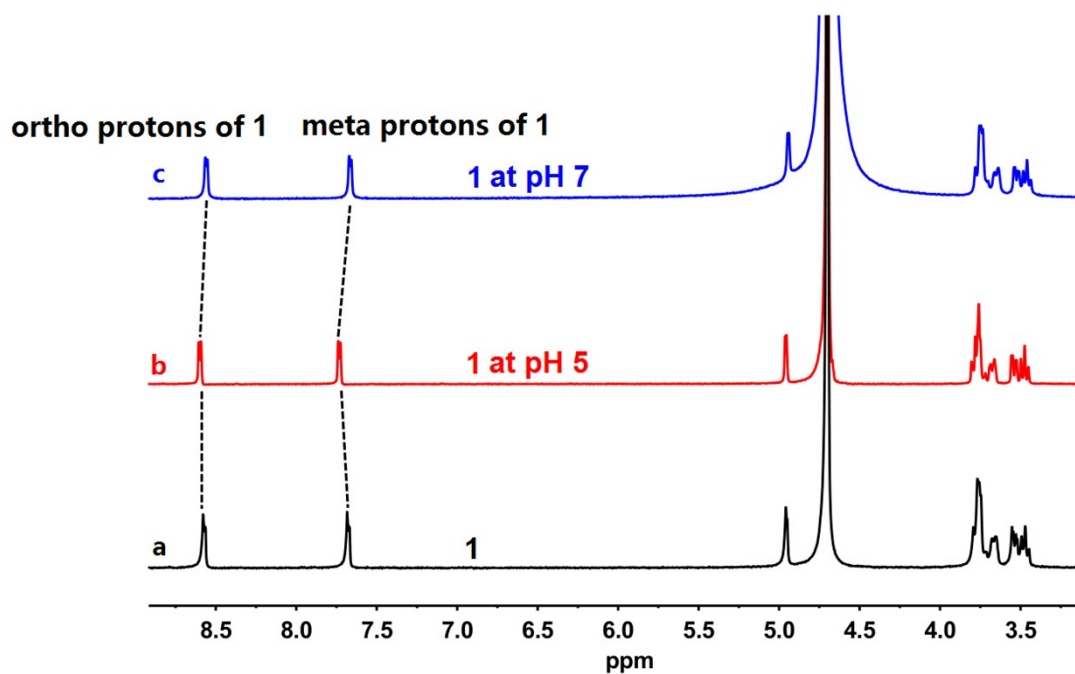

**Figure S6.**  $^1\text{H}$  NMR of (a) **1** ( $2.0 \times 10^{-4}$  M) (b) **1** ( $2.0 \times 10^{-4}$  M) + HCl with pH 5 (c) **1** ( $2.0 \times 10^{-4}$  M) + HCl + NaOH with pH 7 (400 MHz,  $\text{D}_2\text{O}$ , 298 K).

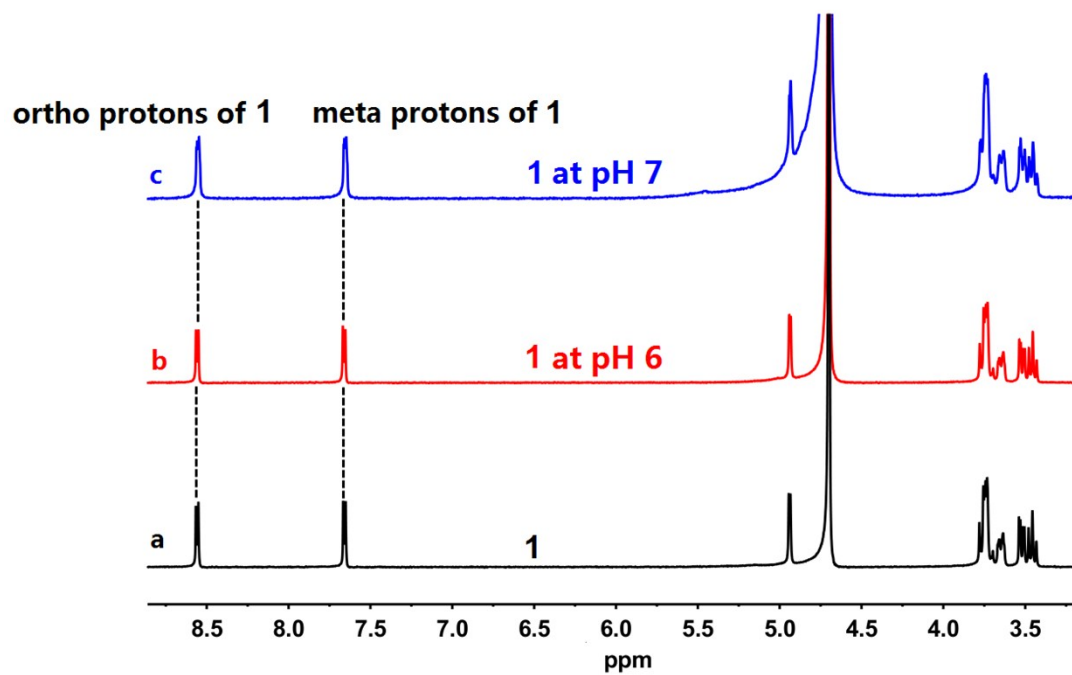

**Figure S7.**  $^1\text{H}$  NMR of (a) **1** ( $2.0 \times 10^{-4}$  M) (b) **1** ( $2.0 \times 10^{-4}$  M) + HCl with pH 6 (c) **1** ( $2.0 \times 10^{-4}$  M) + HCl + NaOH with pH 7 (400 MHz,  $\text{D}_2\text{O}$ , 298 K).

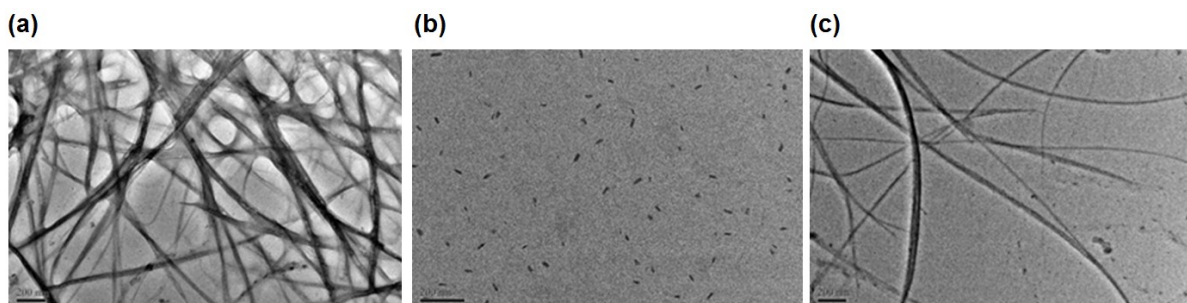

**Figure S8.** TEM of (a) **1**, (a) **1** ( $2.0 \times 10^{-4}$  M) + HCl with pH 3, (b) **1** ( $2.0 \times 10^{-4}$  M) + HCl + NaOH with pH 7.



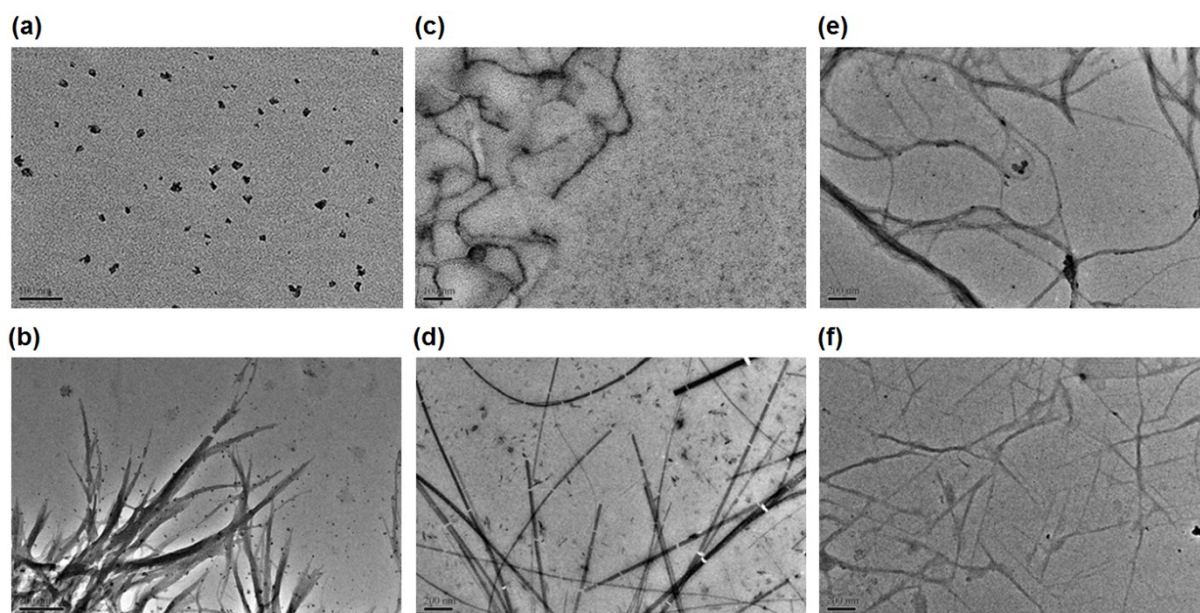

**Figure S9.** TEM of (a) **1** ( $2.0 \times 10^{-4}$  M) + HCl with pH 4, (b) **1** ( $2.0 \times 10^{-4}$  M) + HCl + NaOH with pH 7, (c) **1** ( $2.0 \times 10^{-4}$  M) + HCl with pH 5, (d) **1** ( $2.0 \times 10^{-4}$  M) + HCl + NaOH with pH 7, (e) **1** ( $2.0 \times 10^{-4}$  M) + HCl with pH 6, (f) **1** ( $2.0 \times 10^{-4}$  M) + HCl + NaOH with pH 7.

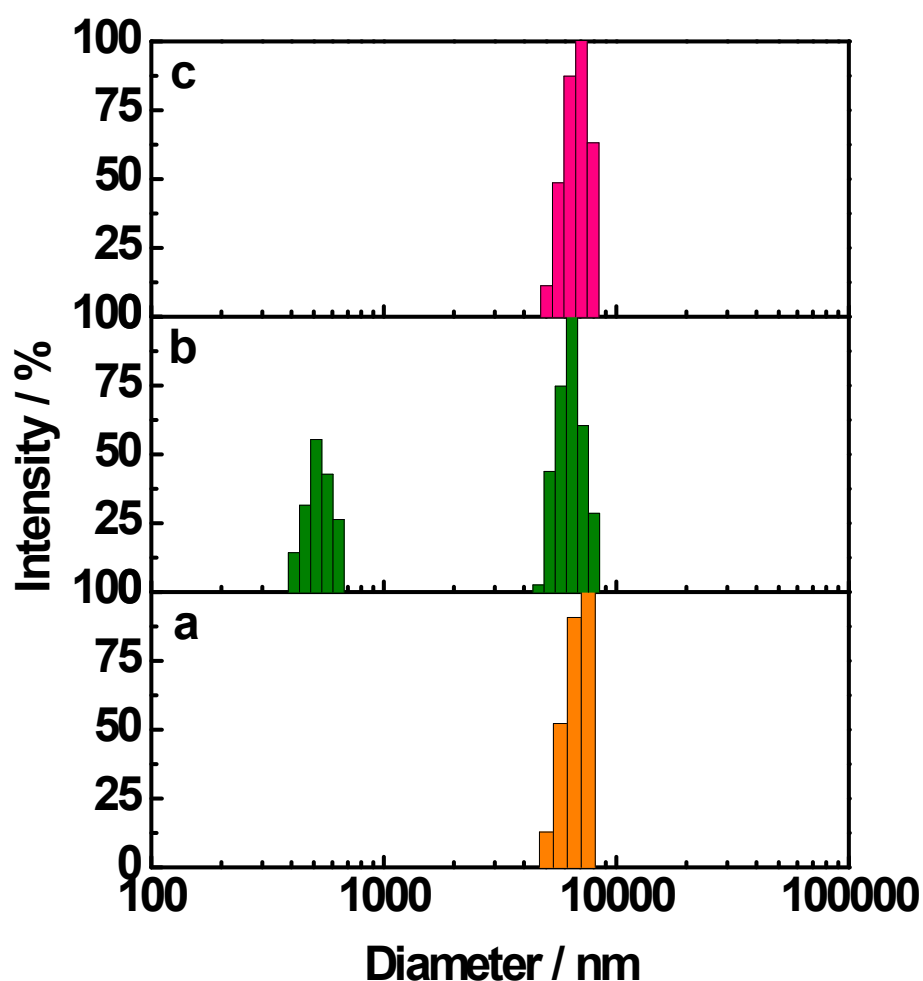

**Figure S10.** DLS of (a) **1** ( $2.0 \times 10^{-4}$  M), (b) **1** ( $2.0 \times 10^{-4}$  M) + HCl with pH 3, (c) **1** ( $2.0 \times 10^{-4}$  M) + HCl + NaOH with pH 7.

#### S4 Protonation of DPD@1 by light

In a typical experiment, an aqueous solution of polypseudorotaxane **1** with MEH was exposed to visible light for 5 min to realize proton transfer from photoacid to DPD@1. Keeping the solution in the dark resulted in the rethreading of polypseudorotaxane **1**. pH measurements, UV-vis spectra, TEM images and DLS studies were recorded to monitor the threading-dethreading process.

Protonation of DPD@1 by Light. In a typical experiment, a aqueous solution of

polypseudorotaxane **1** with MEH was exposed to visible light for 5 min to realize proton transfer from photoacid to DPD@**1**. Keeping the solution in the dark resulted in the rethreading of polypseudorotaxane **1**. pH measurements, UV-vis spectra, TEM images and DLS studies were recorded to monitor the threading-dethreading process.

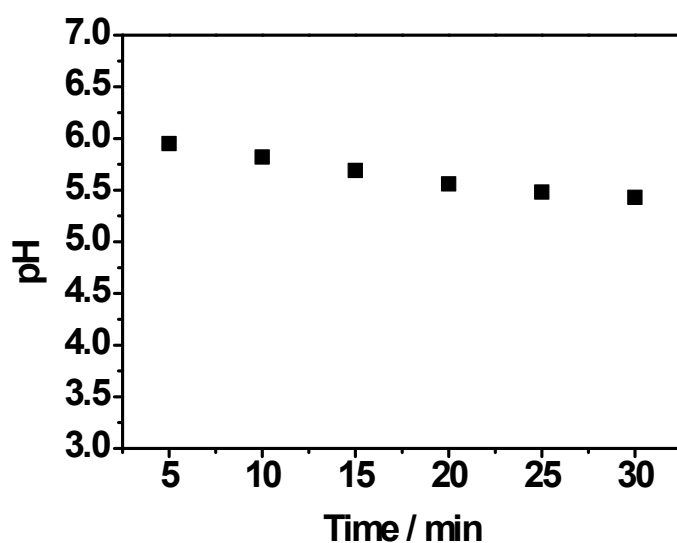

**Figure S11.** pH of **1** ( $2.0 \times 10^{-4}$  M) + MEH ( $6.0 \times 10^{-4}$  M) with different irradiation time.

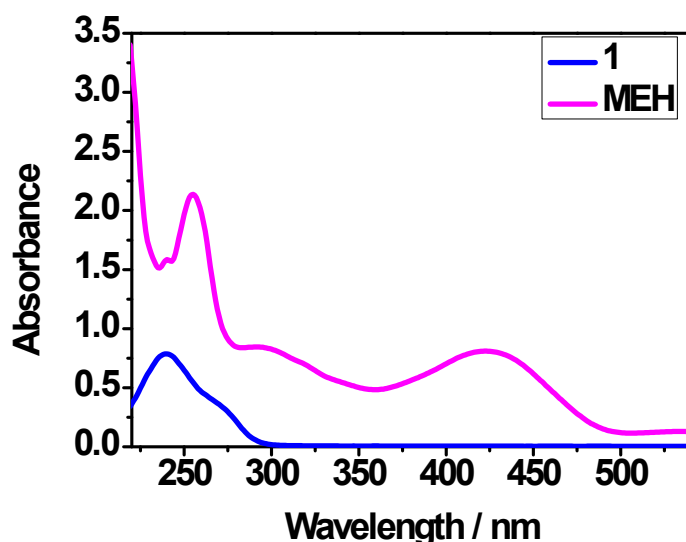

**Figure S12.** UV-vis absorption of MEH ( $2 \times 10^{-4}$  M) and **1** ( $2 \times 10^{-6}$  M), respectively

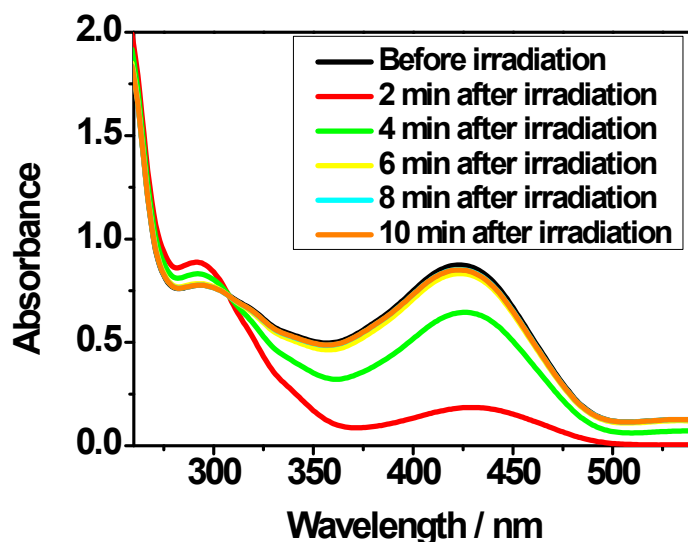

**Figure S13.** UV-vis absorption of MEH ( $2 \times 10^{-4}$  M) before and after irradiation. (irradiation at 420 nm for 5 min, and spectra were collected every 2 min after irradiation)

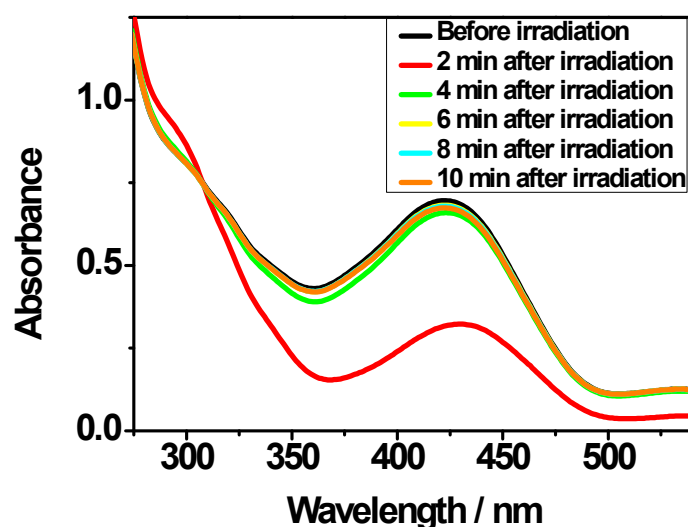

**Figure S14.** UV-vis absorption of MEH ( $2 \times 10^{-4}$  M) + **1** ( $2 \times 10^{-6}$  M) before and after irradiation. (irradiation at 420 nm for 5 min, and spectra were collected every 2 min after irradiation)

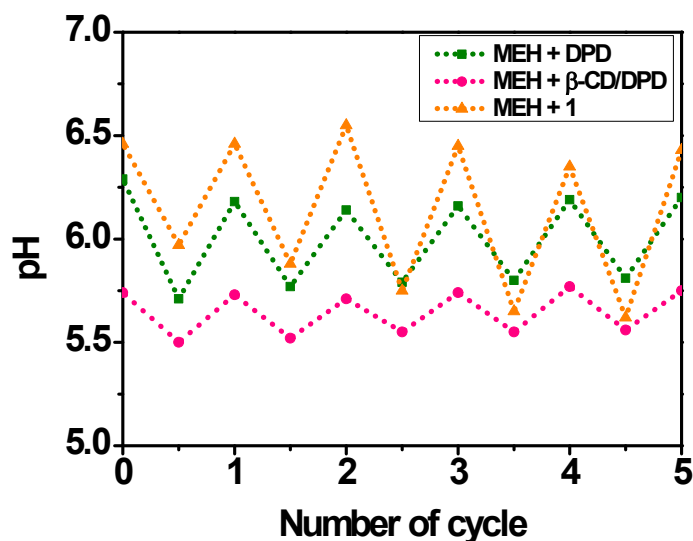

**Figure S15.** Cycles of pH change under irradiation and in the dark. For each cycle, the solution of DPD ( $2.95 \times 10^{-3}$  M) + MEH ( $6.0 \times 10^{-4}$  M) (red), and  $\beta$ -CD/DPD ( $2.95 \times 10^{-3}$  M) + MEH ( $6.0 \times 10^{-4}$  M) (blue) and **1** ( $2.0 \times 10^{-4}$  M) + MEH ( $6.0 \times 10^{-4}$  M) (red) were irradiated with 420 nm for 5 min and kept in the dark for 15 min.

#### References:

1. Pires, M. M.; Przybyla, D. E.; Rubert Pérez, C. M.; Chmielewski, J. *J. Am. Chem. Soc.* 2011, **133**, 14699–14703.
